# Supplementary material for: miRNAs associated with chemo-sensitivity in cell lines and in advanced bladder cancer
Source: PubMed Central journal article supplement (PMC3473298; doi:10.1186/1755-8794-5-40), 2012-09-06
Supplement: 1755-8794-5-40-S1.pdf [file 1755-8794-5-40-S1.pdf]

Additional file 1: Table S1

| Age | Gender | Treatment        | RECIST | OS(months) |
|-----|--------|------------------|--------|------------|
| 58  | M      | g/c II 7014      | PD     | 3,37       |
| 62  | F      | g/c II 7018      | PD     | 3.47       |
| 45  | M      | MVAC up          | PD     | 1          |
| 62  | M      | MVAC up          | PD     | 13,.3      |
| 62  | F      | MVAC up          | PD     | 7.03       |
| 54  | M      | Cis/Carbo/Mtx    | PD     | 0.13       |
| 61  | M      | Cis/Mitox/Mtx    | PD     | 4.63       |
| 38  | F      | cis/pacl/gem 408 | CR     | 22.6       |
| 60  | M      | g/c II 7016      | CR     | 25.53      |
| 55  | M      | g/c II 7019      | CR     | 13.33      |
| 49  | M      | MVAC up          | CR     | 92.13      |
| 52  | M      | MVAC up          | CR     | 49.9       |
| 62  | F      | MVAC up          | CR     | 83.13      |
| 69  | M      | MVAC III 1803    | CR     | 25.1       |
| 65  | M      | Cis/Mitox/Mtx    | CR     | 6.83       |

  

|                  |                                                                                                                                         |
|------------------|-----------------------------------------------------------------------------------------------------------------------------------------|
| MVAC up          | Methotrexate 30 mg/m <sup>2</sup> , vinblastine 3 mg/m <sup>2</sup> , doxorubicin 30 mg/m <sup>2</sup> , cisplatin 70 mg/m              |
| MVAC III 1803    | Methotrexate 30 mg/m <sup>2</sup> , vinblastine 3 mg/m <sup>2</sup> , doxorubicin 30 mg/m <sup>2</sup> , cisplatin 70 mg/m <sup>2</sup> |
| Cis/Mitox/Mtx    | Cisplatin 100 mg/m <sup>2</sup> , methotrexate 30 mg/m <sup>2</sup> , mitoxantrone 10 mg/m <sup>2</sup>                                 |
| cis/pacl/gem 408 | Gemcitabine 1000 mg/m <sup>2</sup> , cisplatin 70 mg/m <sup>2</sup> , paditaxel 175 mg/m <sup>2</sup>                                   |
| Cis/Carbo/Mtx    | Cisplatin 100 mg/m <sup>2</sup> , carboplatin 200 mg/m <sup>2</sup> , methotrexate 250 mg/m <sup>2</sup>                                |
| g/c II           | Gemcitabine 1000 mg/m <sup>2</sup> , cisplatin 35 mg/m <sup>2</sup>                                                                     |
