# Supplementary material for: miRNAs associated with chemo-sensitivity in cell lines and in advanced bladder cancer
Source: PubMed Central journal article supplement (PMC3473298; doi:10.1186/1755-8794-5-40), 2012-09-06
Supplement: 1755-8794-5-40-S2.pdf [file 1755-8794-5-40-S2.pdf]

Additional file 2: Table S2

| Age | Gender | Treatment        | RECIST | OS(months) | Group |
|-----|--------|------------------|--------|------------|-------|
| 54  | M      | Cis/Carbo/Mtx    | PD     | 0.13       | SS    |
| 45  | M      | MVAC up          | PD     | 1          | SS    |
| 58  | M      | g/c II 7014      | PD     | 3.37       | SS    |
| 62  | F      | g/c II 7018      | PD     | 3.47       | SS    |
| 71  | M      | g/c up           | PR     | 4.43       | SS    |
| 61  | M      | Cis/Mitox/Mtx    | PD     | 4.63       | SS    |
| 68  | M      | g/c III 1826     | NE     | 4.87       | SS    |
| 57  | F      | g/c up           | NE     | 5.2        | SS    |
| 37  | M      | cis/pacl/gem 410 | PR     | 5.3        | SS    |
| 65  | M      | Cis/Mitox/Mtx    | CR     | 6.83       | SS    |
| 39  | F      | cis/pacl/gem 402 | PD     | 6.93       | SS    |
| 62  | F      | MVAC up          | PD     | 7.03       | SS    |
| 75  | M      | MVAC III 1833    | NC     | 7.47       | SS    |
| 67  | M      | g/c up           | NC     | 8.4        | SS    |
| 69  | M      | g/c III 1805     | NC     | 10.9       | SS    |
| 62  | M      | MVAC up          | PD     | 13.23      | LS    |
| 55  | M      | g/c II 7019      | CR     | 13.33      | LS    |
| 38  | F      | cis/pacl/gem 408 | CR     | 22.6       | LS    |
| 69  | M      | MVAC III 1803    | CR     | 25.1       | LS    |
| 60  | M      | g/c II 7016      | CR     | 25.53      | LS    |
| 59  | F      | cis/pacl/gem 409 | PR     | 49.83      | LS    |
| 52  | M      | MVAC up          | CR     | 49.9       | LS    |
| 74  | F      | g/c up           | PR     | 51.33      | LS    |
| 64  | M      | cis/pacl/gem 406 | PR     | 68.13      | LS    |
| 62  | F      | MVAC up          | CR     | 83.13      | LS    |
| 48  | F      | MVAC up          | NE     | 87.5       | LS    |
| 62  | M      | MVAC up          | NE     | 92         | LS    |
| 49  | M      | MVAC up          | CR     | 92.13      | LS    |
| 65  | M      | g/c III 1842     | PR     | 97         | LS    |
| 65  | M      | g/c II 7015      | PR     | 125.07     | LS    |

MVAC up           Methotrexate 30 mg/m<sup>2</sup>, vinblastine 3 mg/m<sup>2</sup>, doxorubicin 30 mg/m<sup>2</sup>, cisplatin 70 mg/m<sup>2</sup>

MVAC III 1803   Methotrexate 30 mg/m<sup>2</sup>, vinblastine 3 mg/m<sup>2</sup>, doxorubicin 30 mg/m<sup>2</sup>, cisplatin 70 mg/m<sup>2</sup>

Cis/Mitox/Mtx   Cisplatin 100 mg/m<sup>2</sup>, methotrexate 30 mg/m<sup>2</sup>, mitoxantrone 10 mg/m<sup>2</sup>

cis/pacl/gem 408 Gemcitabine 1000 mg/m<sup>2</sup>, cisplatin 70 mg/m<sup>2</sup>, paclitaxel 175 mg/m<sup>2</sup>

Cis/Carbo/Mtx   Cisplatin 100 mg/m<sup>2</sup>, carboplatin 200 mg/m<sup>2</sup>, methotrexate 250 mg/m<sup>2</sup>

g/c II            Gemcitabine 1000 mg/m<sup>2</sup>, cisplatin 35 mg/m<sup>2</sup>
