# Supplementary material for: miRNAs associated with chemo-sensitivity in cell lines and in advanced bladder cancer
Source: PubMed Central journal article supplement (PMC3473298; doi:10.1186/1755-8794-5-40), 2012-09-06
Supplement: 1755-8794-5-40-S3.pdf [file 1755-8794-5-40-S3.pdf]

Additional file 3: Table S3

| Normalized to Mamm6U    |             |              | Normalized to RNU48     |             |              | Normalized to miR-193b  |             |              | Quantile normalization  |             |              |
|-------------------------|-------------|--------------|-------------------------|-------------|--------------|-------------------------|-------------|--------------|-------------------------|-------------|--------------|
| Detector                | Fold Change | Ttest(PD,CR) | Detector                | Fold Change | Ttest(PD,CR) | Detector                | Fold Change | Ttest(PD,CR) | Detector                | Fold Change | Ttest(PD,CR) |
| hsa-miR-642-4380995     | -5.5        | 0,000        | hsa-miR-642-4380995     | -5,0        | 0,001        | hsa-miR-642-4380995     | -3,8        | 0,001        | hsa-miR-196b-4395326    | 2,1         | 0,002        |
| hsa-miR-27a-4373287     | -3,5        | 0,000        | hsa-miR-296-5p-4373066  | -4,0        | 0,003        | hsa-miR-492-4373217     | -2,9        | 0,003        | hsa-miR-186-4395396     | 1,4         | 0,002        |
| hsa-miR-27b-4373068     | -2,7        | 0,001        | hsa-miR-27a-4373287     | -3,0        | 0,004        | hsa-miR-27a-4373287     | -1,8        | 0,003        | hsa-miR-138-4395395     | 3,7         | 0,003        |
| hsa-miR-24-4373072      | -2,9        | 0,001        | hsa-miR-24-4373072      | -2,4        | 0,005        | hsa-miR-296-5p-4373066  | -2,8        | 0,003        | hsa-miR-639-4380987     | -1,7        | 0,003        |
| hsa-miR-335-4373045     | -3,4        | 0,001        | hsa-miR-365-4373194     | -2,6        | 0,006        | hsa-miR-944-4395300     | -3,6        | 0,006        | hsa-miR-296-5p-4373066  | -2,4        | 0,007        |
| hsa-miR-296-5p-4373066  | -4,5        | 0,001        | hsa-miR-335-4373045     | -2,9        | 0,007        | hsa-miR-26b*-4395555    | -2,6        | 0,007        | hsa-miR-642-4380995     | -2,8        | 0,008        |
| hsa-miR-27b*-4395285    | -2,3        | 0,002        | hsa-miR-339-5p-4395368  | -2,7        | 0,007        | hsa-miR-193a-5p-4395392 | -2,6        | 0,009        | hsa-miR-19b-1*-4395536  | 0,8         | 0,008        |
| hsa-miR-576-3p-4395462  | -3,3        | 0,002        | hsa-miR-625-4395542     | -2,3        | 0,007        | hsa-miR-886-3p-4395305  | -2,1        | 0,020        | hsa-miR-944-4395300     | -3,7        | 0,009        |
| hsa-miR-218-4373081     | -3,1        | 0,002        | hsa-miR-193a-5p-4395392 | -3,8        | 0,008        | hsa-miR-576-3p-4395462  | -1,6        | 0,020        | hsa-miR-331-5p-4395344  | 1,2         | 0,012        |
| hsa-miR-324-5p-4373052  | -2,6        | 0,003        | hsa-miR-199a-5p-4373272 | -2,6        | 0,010        | hsa-miR-923-4395264     | -2,5        | 0,021        | hsa-miR-576-3p-4395462  | -0,9        | 0,012        |
| hsa-miR-365-4373194     | -3,1        | 0,003        | hsa-miR-576-3p-4395462  | -2,8        | 0,010        | hsa-miR-186-4395396     | 1,0         | 0,022        | hsa-miR-339-3p-4395295  | 1,5         | 0,013        |
| hsa-miR-625-4395542     | -2,8        | 0,003        | hsa-miR-124-4373295     | -3,2        | 0,010        | hsa-miR-625-4395542     | -1,2        | 0,022        | hsa-miR-628-5p-4395544  | 1,4         | 0,015        |
| hsa-miR-183*-4395381    | -2,4        | 0,004        | hsa-miR-27b-4373068     | -2,2        | 0,011        | hsa-miR-24-4373072      | -1,3        | 0,022        | hsa-miR-492-4373217     | -1,8        | 0,016        |
| hsa-miR-34a-4395168     | -2,6        | 0,004        | hsa-miR-492-4373217     | -3,9        | 0,011        | hsa-miR-639-4380987     | -1,8        | 0,023        | hsa-miR-24-4373072      | -0,9        | 0,018        |
| hsa-miR-181a*-4373086   | -3,5        | 0,005        | hsa-miR-218-4373081     | -2,6        | 0,011        | hsa-miR-199a-5p-4373272 | -1,2        | 0,037        | hsa-miR-193a-5p-4395392 | -1,8        | 0,023        |
| hsa-miR-492-4373217     | -4,1        | 0,005        | hsa-miR-330-3p-4373047  | -1,9        | 0,013        | hsa-miR-138-4395395     | 2,5         | 0,037        | hsa-miR-335-4373045     | -1,0        | 0,028        |
| hsa-miR-374b-4381045    | -2,4        | 0,005        | hsa-miR-944-4395300     | -3,7        | 0,014        | hsa-miR-124-4373295     | -1,8        | 0,040        | hsa-miR-27a-4373287     | -1,3        | 0,036        |
| hsa-miR-193a-5p-4395392 | -4,3        | 0,006        | hsa-miR-34a-4395168     | -2,1        | 0,016        | hsa-miR-218-4373081     | -1,5        | 0,042        | hsa-miR-345-4395297     | 1,6         | 0,039        |
| hsa-miR-330-3p-4373047  | -2,4        | 0,006        | hsa-miR-324-5p-4373052  | -2,1        | 0,019        | hsa-miR-152-4395170     | -1,2        | 0,043        | hsa-miR-923-4395264     | -1,6        | 0,044        |
| hsa-miR-20a*-4395548    | -3,2        | 0,006        | hsa-miR-923-4395264     | -2,9        | 0,022        | hsa-miR-339-3p-4395295  | 0,9         | 0,051        | hsa-miR-432-4373280     | 1,7         | 0,044        |
| hsa-miR-136*-4395211    | -3,0        | 0,006        | hsa-miR-192-4373108     | -2,4        | 0,022        |                         |             |              | hsa-miR-574-3p-4395460  | 1,4         | 0,047        |
| hsa-miR-639-4380987     | -3,9        | 0,006        | hsa-miR-639-4380987     | -2,3        | 0,024        |                         |             |              | hsa-miR-191-4395410     | 0,9         | 0,053        |
| hsa-miR-199a-5p-4373272 | -3,1        | 0,006        | hsa-miR-886-3p-4395305  | -3,3        | 0,024        |                         |             |              |                         |             |              |
| hsa-miR-923-4395264     | -4,5        | 0,007        | hsa-miR-422a-4395408    | -1,9        | 0,025        |                         |             |              |                         |             |              |
| hsa-miR-944-4395300     | -5,3        | 0,007        | hsa-miR-206-4373092     | -1,9        | 0,055        |                         |             |              |                         |             |              |
