# Supplementary material for: miRNAs associated with chemo-sensitivity in cell lines and in advanced bladder cancer
Source: PubMed Central journal article supplement (PMC3473298; doi:10.1186/1755-8794-5-40), 2012-09-06
Supplement: 1755-8794-5-40-S4.pdf [file 1755-8794-5-40-S4.pdf]

**Additional file 4: Table S4**

| Target miR      | LDA Analysis<br>Log2 (PD vs. CR) | QPCR singelplex<br>Log2 (PD vs. CR) |
|-----------------|----------------------------------|-------------------------------------|
| Hsa-miR-27a     | -1.8                             | -1.9                                |
| Hsa-miR-193a-5p | -2.6                             | -2.8                                |
| Hsa-miR-296-5p  | -2.8                             | -2.8                                |
| Hsa-miR-492     | -2.9                             | -2.7                                |
| Hsa-miR-642     | -3.8                             | -3.9                                |
| Hsa-miR-944     | -3.6                             | -3.2                                |
