# Supplementary material for: miRNAs associated with chemo-sensitivity in cell lines and in advanced bladder cancer
Source: PubMed Central journal article supplement (PMC3473298; doi:10.1186/1755-8794-5-40), 2012-09-06
Supplement: 1755-8794-5-40-S5.pdf [file 1755-8794-5-40-S5.pdf]

Additional file 5: Table S5

| Normalized to hsa-miR-324-3p-4395272 |             |       | Normalized to MammU6-4395470 |             |       | Normalized to hsa-miR-193b-4395478 |             |       |
|--------------------------------------|-------------|-------|------------------------------|-------------|-------|------------------------------------|-------------|-------|
| Detector                             | Fold Change | Ttest | Detector                     | Fold Change | Ttest | Detector                           | Fold Change | Ttest |
| hsa-miR-410-4378093                  | -1,15       | 0,011 | hsa-miR-886-5p-4395304       | -2,22       | 0,005 | hsa-miR-886-5p-4395304             | -1,64       | 0,007 |
| hsa-miR-886-3p-4395305               | -1,60       | 0,011 | hsa-miR-27a*-4395556         | -1,78       | 0,008 | hsa-miR-944-4395300                | -1,80       | 0,018 |
| hsa-miR-944-4395300                  | -1,80       | 0,018 | hsa-miR-410-4378093          | -1,90       | 0,014 | hsa-miR-923-4395264                | -1,50       | 0,018 |
| hsa-miR-923-4395264                  | -1,50       | 0,018 | hsa-miR-380*-4373021         | -1,97       | 0,015 | hsa-miR-410-4378093                | -1,32       | 0,041 |
| hsa-miR-196b-4395326                 | 1,24        | 0,019 | hsa-miR-886-3p-4395305       | -2,35       | 0,024 | hsa-miR-886-3p-4395305             | -1,78       | 0,051 |
| hsa-miR-138-4395395                  | 1,94        | 0,022 | hsa-miR-222-4395387          | -1,45       | 0,033 | hsa-miR-138-4395395                | 1,77        | 0,052 |
| hsa-miR-345-4395297                  | 0,91        | 0,055 | hsa-miR-923-4395264          | -2,32       | 0,036 | hsa-miR-222-4395387                | -0,87       | 0,069 |
| hsa-miR-886-5p-4395304               | -1,47       | 0,058 | hsa-miR-21*-4395549          | -1,22       | 0,046 | hsa-miR-223-4395406                | -1,35       | 0,103 |
| hsa-miR-186-4395396                  | 0,81        | 0,071 | RNU44-4373384                | -1,11       | 0,048 | hsa-miR-146b-5p-4373178            | -1,08       | 0,113 |
