# Supplementary material for: miRNAs associated with chemo-sensitivity in cell lines and in advanced bladder cancer
Source: PubMed Central journal article supplement (PMC3473298; doi:10.1186/1755-8794-5-40), 2012-09-06

Additional file 6: Figure S1

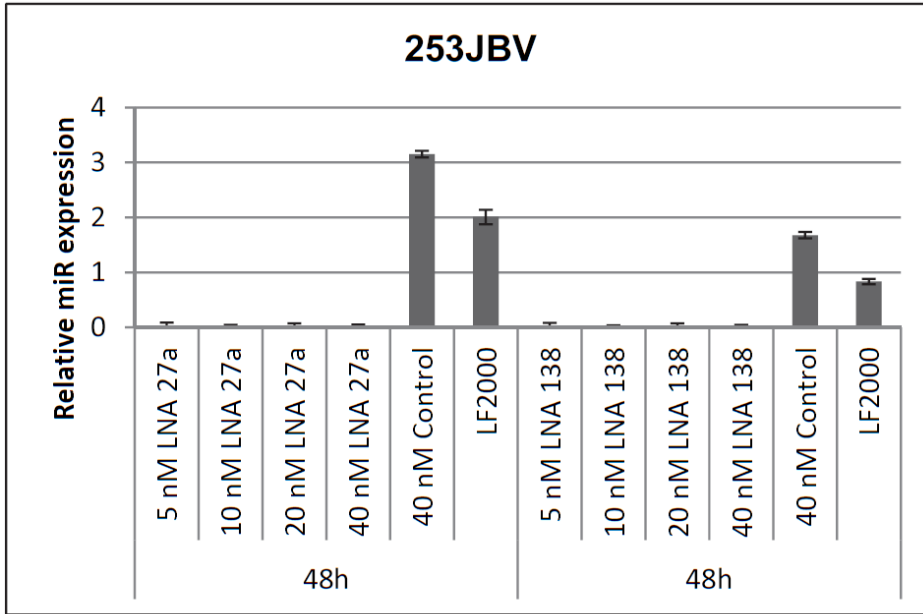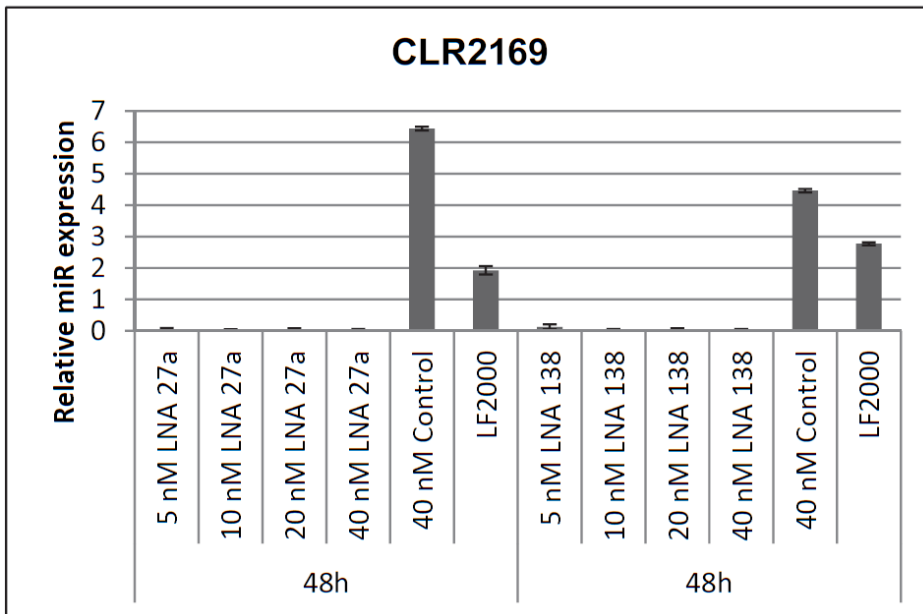

Supplement: 1755-8794-5-40-S6.pdf [file 1755-8794-5-40-S6.pdf]
